## **Antiparallel protocadherin homodimers use distinct affinity- and specificity-mediating regions in cadherin repeats 1-4**

John M. Nicoludis<sup>1,2</sup>, Bennett E. Vogt<sup>2</sup>, Anna G. Green<sup>3</sup>, Charlotta P. I. Schärfe<sup>3,4</sup>, Debora S. Marks<sup>3</sup>, Rachelle Gaudet<sup>2,\*</sup>

<sup>1</sup>Department of Chemistry and Chemical Biology, Harvard University, 12 Oxford Street, Cambridge, MA, 02138, USA

<sup>2</sup>Department of Molecular and Cellular Biology, Harvard University, 7 Divinity Avenue, Cambridge, MA, 02138, USA

<sup>3</sup>Department of Systems Biology, Harvard Medical School, Boston, MA, 02115, USA

<sup>4</sup>Applied Bioinformatics, Department of Computer Science, University of Tübingen, 72076 Tübingen, Germany

\*Correspondence: [gaudet@mcb.harvard.edu](mailto:gaudet@mcb.harvard.edu)

# ABSTRACT

Protocadherins (Pcdhs) are cell adhesion and signaling proteins used by neurons to develop and maintain neuronal networks, relying on *trans* homophilic interactions between their extracellular cadherin (EC) repeat domains. We present the structure of the antiparallel EC1-4 homodimer of human PcdhyB3, a member of the  $\gamma$  subfamily of clustered Pcdhs. Structure and sequence comparisons of  $\alpha$ ,  $\beta$ , and  $\gamma$  clustered Pcdh isoforms illustrate that subfamilies encode specificity in distinct ways through diversification of loop region structure and composition in EC2 and EC3, which contains isoform-specific conservation of primarily polar residues. In contrast, the EC1/EC4 interface comprises hydrophobic interactions that provide non-selective dimerization affinity. Using sequence coevolution analysis, we found evidence for a similar antiparallel EC1-4 interaction in non-clustered Pcdh families. We thus deduce that the EC1-4 antiparallel homodimer is a general interaction strategy that evolved before the divergence of these distinct protocadherin families.

## Introduction

Protocadherins (Pcdhs) encompass about 70% of the cadherin superfamily in mammals, and are involved in cell adhesion in the nervous system of higher animals (Hulpiau and Van Roy, 2011; Hulpiau et al., 2013; Keeler et al., 2015; Sotomayor et al., 2014). Pcdhs segregate into two groups: clustered (expressed from a large gene cluster) and non-clustered. Clustered Pcdhs, comprising the  $\alpha$ ,  $\beta$ , and  $\gamma$  subfamilies, mediate neuronal survival, self-avoidance and self/nonself discrimination, and promote dendritic arborization in neuronal cells (Emond and Jontes, 2008; Garrett et al., 2012; Kostadinov and Sanes, 2015; Ledderose et al., 2013; Lefebvre et al., 2012; Molumby et al., 2016; Suo et al., 2012; Wang et al., 2002; Weiner et al., 2005). Clustered Pcdhs thus function analogously to insect Dscam isoforms to mediate neuronal identity (Zipursky and Sanes, 2010). Clustered Pcdhs are also broadly involved in synapse formation and maintenance, neuronal connectivity and neuronal survival (Hayashi and Takeichi, 2015; Keeler et al., 2015). Non-clustered Pcdhs play key roles in neuronal development (Keeler et al., 2015; Kim et al., 2011). For example, Pcdh7 is involved in germ layer differentiation (Rashid et al., 2006; Yoshida, 2003), and Pcdh1 and Pcdh8 mediate cell sorting and migration during gastrulation (Kim et al., 1998; Kuroda et al., 2002). Both clustered and non-clustered Pcdhs control these phenotypes through homophilic interactions of their extracellular cadherin (EC) repeat domains (Hirano et al., 1999; Hoshina et al., 2013; Kim et al., 1998; Kuroda et al., 2002; Schreiner and Weiner, 2010; Thu et al., 2014; Yamagata et al., 1999; Yoshida, 2003).

Clustered Pcdh subfamilies show distinct phenotypes. In zebrafish,  $\alpha$  and  $\gamma$  Pcdhs express in overlapping but distinct brain regions (Biswas et al., 2012). In mammals,  $\alpha$  Pcdhs regulate sorting of olfactory sensory neuron axons into glomeruli, serotonergic axon maturation, and dendritic patterning in CA1 pyramidal neurons (Hasegawa et al., 2012, 2008; Katori et al., 2009; Suo et al., 2012). The  $\gamma$  subfamily is important for self/non-self discrimination in retinal starburst amacrine cells and Purkinje neurons (Kostadinov and Sanes, 2015; Lefebvre et al.,

2012). Thus, available data suggest that the different Pcdh subfamilies may function independently or cooperatively, perhaps depending on the brain region and/or neuronal cell type.

Our recent PcdhyA1 and PcdhyC3 EC1-3 structures revealed dimer interactions between EC2 and EC3 (Nicoludis et al., 2015), consistent with previous biochemical and bioinformatics data (Schreiner and Weiner, 2010; Wu, 2005). Using sequence co-evolution analysis, we predicted intersubunit EC1-EC4 interactions, and proposed that clustered Pcdhs form extended antiparallel homodimers engaging EC1-4. A complementary biochemical and structural study arrived at a very similar docking model (Rubinstein et al., 2015), which was recently confirmed for  $\alpha$  and  $\beta$  clustered Pcdhs (Goodman et al., 2016).

We determined the crystal structure of PcdhyB3 EC1-4, the first full antiparallel dimer for a  $\gamma$  isoform. We analyzed the clustered Pcdhs structures in light of biological, biochemical and evolutionary data to further resolve how clustered Pcdhs encode specificity. We describe how structural differences between the  $\alpha$ ,  $\beta$  and  $\gamma$  subfamilies generate distinct modes of specificity encoding. We also provide evidence that the EC1/EC4 and EC2/EC3 interfaces are functionally different: EC1/EC4 provides nonselective dimerization affinity while EC2/EC3 is generally responsible for enforcing specificity. Finally, we extend our sequence coevolution analysis to the non-clustered Pcdhs and provide evidence that the EC1-4 interaction is broadly used by Pcdhs.

## Results and Discussion

### *Structure of the PcdhyB3 EC1-4 extended antiparallel dimer*

The *in vitro*-refolded recombinantly-expressed PcdhyB3 EC1-4 (47 kDa) yielded two peaks on size exclusion chromatography (SEC; **Figure S1**). Based on multi-angle light scattering (MALS; **Figure S1**), peak 1 was wide and polydisperse (~200-300 kDa). Peak 2 was monodisperse at 80 kDa – consistent with a dimer – readily yielded a crystal structure (**Table**



**S1**). As expected, each EC forms a seven-stranded Greek key  $\beta$ -sandwich motif (**Figure 1A**), similarly to other clustered Pcdh structures (Goodman et al., 2016; Nicoludis et al., 2015; Rubinstein et al., 2015). Notably, EC4 has a unique topology compared to EC1-EC3 (**Figure 1B, 1C**) and all known cadherin repeat structures. Strand  $\beta$ 1a is extended by 4-5 residues, while  $\beta$ 1b is correspondingly shortened. Additionally, while in EC1-3 strand  $\beta$ 2 splits into  $\beta$ 2a and  $\beta$ 2b, interacting with strands  $\beta$ 5 and  $\beta$ 1a, respectively, in EC4 it forms a continuous strand interacting with both simultaneously. This distinct topology contributes to intersubunit EC1/EC4 interactions (see below).

Although the asymmetric unit contains a single Pcdh $\gamma$ B3 molecule, a crystallographic two-fold axis generates an antiparallel dimer with intersubunit EC1/EC4 and EC2/EC3 interactions (**Figure 1A**). This dimer is consistent with the Pcdh $\gamma$ A1 EC1-3 crystal structure, validating the previously predicted interface (Nicoludis et al., 2015; Rubinstein et al., 2015), and with recent  $\alpha$  and  $\beta$  Pcdhs structures (Goodman et al., 2016), confirming that this interaction mechanism is conserved among all clustered Pcdh subfamilies (**Figure 1D**). The structures do differ noticeably in overall twist, including subfamily-specific differences in relative EC1/EC4 orientation (**Figure 1E**).

The linear architecture of clustered Pcdhs enables extended antiparallel dimer interfaces. Overall, the tilt and azimuthal angles between adjacent clustered Pcdh repeats are distinct from those of classical cadherins (**Figure S2**) (Nicoludis et al., 2015). Classical cadherins, which typically dimerize through EC1/EC1 interfaces, exhibit smaller tilt angles and thus an overall curved structure (Boggon et al., 2002). Notably, the clustered Pcdh repeat orientation is such that EC1 and EC3 use the same face for intersubunit contacts, as do EC2 and EC4 (**Figure S3**), suggesting that longer cadherins could readily form even more extended interfaces.

## *Clustered protocadherin subfamilies have distinct specificity mechanisms dictated by structural differences*

Clustered Pcdh subfamilies control different phenotypes *in vivo* and have discrete expression patterns (Biswas et al., 2012; Keeler et al., 2015), suggesting that they encode specificity using distinct modes, which may relate to subfamily-specific structural features. To investigate this hypothesis, we calculated the isoform conservation ratio (ICR) within individual subfamilies, which quantifies the extent to which individual residue positions are conserved among orthologs (same isoform in different species) and diversified in paralogs (different isoforms in the same species) (Nicoludis et al., 2015), resulting in three ICR value sets for the  $\alpha$ ,  $\beta$  and  $\gamma$  subfamilies, respectively (**Figure S4**). To account for subfamily differences in sequence conservation, we normalized the ICR values – dividing by the subfamily average. We then mapped them onto the Pcdh $\alpha$ 7 EC1-5, Pcdh $\beta$ 8 EC1-4 and Pcdh $\gamma$ B3 EC1-4 structures (**Figure 2A**). Comparing the structures and isoform-specific conservation in the different subfamilies allowed us to identify key specificity determinant regions for individual subfamilies. We illustrate three examples of how the subfamilies have encoded specificity using unique structural features.

In  $\alpha$  isoforms, the EC2  $\beta$ 4- $\beta$ 5 loop is enriched in high-ICR and chemically diverse residues, and differs in conformation in the Pcdh $\alpha$ 4 and Pcdh $\alpha$ 7 structures (**Figure 2B**): the Pcdh $\alpha$ 4 EC2  $\beta$ 4- $\beta$ 5 loop contacts  $\beta$ 1b of EC3, while the corresponding loop in Pcdh $\alpha$ 7 does not, suggesting variable interactions in other isoforms. In comparison, the EC2  $\beta$ 4- $\beta$ 5 loop residues in both  $\beta$  and  $\gamma$  isoforms have lower ICR values, more similar loop structure, and do not contact  $\beta$ 1b of EC3. Thus, this loop may have evolved to generate diversity within  $\alpha$  isoforms, but not in other subfamilies.

In  $\beta$  isoforms, the Phe-X<sub>10</sub>-Phe loop between  $\beta$ 3 and  $\beta$ 4 of EC3 has limited diversity compared to  $\alpha$  and  $\gamma$  isoforms and wedges between the EC2  $\beta$ 4- $\beta$ 5 loop and  $\beta$ 2b strand (**Figure**

**2C).** In contrast, the Phe-X<sub>10</sub>-Phe loop of  $\alpha$  and  $\gamma$  isoforms has a helical conformation, and has residues with higher ICR values and greater chemical diversity. Therefore alterations in secondary structure can alter how specificity is encoded within the subfamilies.

The short loop following the extended  $\beta$ 1a strand in EC4 contacts the EC1  $\beta$ 6- $\beta$ 7 loop (**Figure 2D**), and there are large structural differences in the EC1/EC4 interaction between subfamilies (**Figure 1E**).  $\alpha$  Isoforms have low-ICR residues at this interface, whereas  $\beta$  and  $\gamma$  isoforms have higher ICR value residues. This thus suggests that the large structural differences drive inter-subfamily specificity, on which may be layered additional isoform specificity.

In all cases, sequence regions with high isoform-specific conservation correlate with interface contacts, revealing the interplay between dimer structure and how subfamilies encode specificity. Diversity in the composition and conformation of loop regions provides distinct specificity mechanisms to subfamilies. Phylogenetic analysis indicates that isoforms are more similar within than across subfamilies (Sotomayor et al., 2014; Wu, 2005), and the available structures show that the interface architecture is more similar within subfamilies as well (**Figure 1E**) (Goodman et al., 2016; Nicoludis et al., 2015). With this insight, the dimer interface seen in the Pcdh $\gamma$ C3 EC1-3 crystal structure may represent a unique dimer architecture for C-type isoforms (Nicoludis et al., 2015), as these isoforms are transcriptionally, functionally and evolutionarily distinct from the subfamilies in which they reside (Chen et al., 2012; Frank et al., 2005; Kaneko et al., 2006). Distinct expression of the clustered Pcdh subfamilies in different tissues and at different developmental stages supports the necessity for intra-subfamily specificity (Biswas et al., 2012; Frank et al., 2005). Differences in subfamily structure and isoform-specific conservation suggest that homophilic specificity mechanisms emerged independently in each subfamily through diversification of subfamily-specific interface contacts.

### *The EC1/EC4 interaction provides affinity of dimerization*

The EC2/EC3 interaction is integral to clustered Pcdh dimerization specificity, as evidenced by bioinformatics and cell-aggregation assays (Nicoludis et al., 2015; Rubinstein et al., 2015; Schreiner and Weiner, 2010; Thu et al., 2014; Wu, 2005). We sought to understand the functional purpose of the EC1/EC4 interaction, and made three observations. First, for all isoforms with available structures, fewer EC1/EC4 interface residues have high isoform-specific conservation compared to the EC2/EC3 interface residues (**Figure 2A, S4**). Second, interface residues shared by most isoforms are more hydrophobic in EC1/EC4 than in EC2/EC3 (**Figure 3A**). Third, the Pcdh $\gamma$ B3 EC1/EC4 interface is much larger (BSA = 976 Å<sup>2</sup> per protomer) than the EC2/EC3 interface (555 Å<sup>2</sup> per protomer). The lack of isoform specificity, the hydrophobic nature, and large interface area together suggest that the EC1/EC4 interface promotes binding with little specificity.

To probe this hypothesis, we used the Computational Interface Alanine Scanning Server to assess each interface residue's contribution to the free energy of complex formation ( $\Delta\Delta G_{\text{calc}}$ ) when computationally mutated to alanine (Kortemme and Baker, 2002; Kortemme et al., 2004). Using the five available EC1-4 interfaces, two residue groups emerged from comparing the ICR values to  $\Delta\Delta G_{\text{calc}}$ : one group with low ICR values and high  $\Delta\Delta G_{\text{calc}}$ , the other with high ICR values and low  $\Delta\Delta G_{\text{calc}}$  (**Figure 3B**). These residue groups can be regarded as contributing to the affinity and specificity of the complex, respectively. When mapped on Pcdh $\gamma$ B3, predicted affinity residues concentrated on EC1 and EC4, and predicted specificity residues on EC2 and EC3, corroborating the distinction between EC1/EC4 and EC2/EC3 interactions (**Figure 3C**).

In the Pcdh $\gamma$ B3 EC1/EC4 interface, F86, one of the predicted affinity-driving residues from EC1, wedges into a cavity created by hydrophobic EC4 residues (**Figure 3D**). A Pcdh $\gamma$ B3 EC1-4 F86A mutant indeed disrupted dimerization, resulting in a monomeric protein as measured by MALS (**Figure 3E**). Thus, the hydrophobic interactions between EC1 and EC4 are

crucial to dimerization. Analogously, purified EC1-3 constructs failed to dimerize *in vitro* whereas EC1-4 constructs did (Nicoludis et al., 2015; Rubinstein et al., 2015), and K562 cells expressing  $\Delta$ EC1 or  $\Delta$ EC4-6 constructs did not aggregate while cells expressing chimeras in which EC1 and EC4 derived from different paralogs did (Schreiner and Weiner, 2010; Thu et al., 2014). Together, these results indicate that the EC1/EC4 interaction is not strictly required for the specificity of dimerization but it drives dimerization affinity through non-specific hydrophobic interactions.

#### *Antiparallel EC1-4 interaction is predicted in non-clustered Pcdhs*

The antiparallel EC1-4 interaction architecture can encode diverse specificities within the clustered Pcdh family. Is this architecture unique to clustered Pcdhs or is it ancestral, and thus also found in non-clustered Pcdhs? These include the  $\delta$ -1 (Pcdh1, Pcdh7, Pcdh9, Pcdh11) and  $\delta$ -2 (Pcdh8, Pcdh10, Pcdh17, Pcdh18, Pcdh19) families that are integral to the development and maintenance of the nervous system (Keeler et al., 2015; Kim et al., 2011). We used sequence coevolution analysis, which successfully predicted the clustered Pcdh interface (Nicoludis et al., 2015) (**Figure S5**), to look for evidence of an antiparallel interface in non-clustered Pcdhs (**Figure 4A**). As in clustered Pcdhs, most covarying residue pairs in non-clustered Pcdhs were intra-domain structural contacts of the well-conserved cadherin fold. Additionally, several covarying pairs are found between EC2 and EC3, or EC1 and EC4, similar to those observed for the clustered Pcdhs. When mapped onto the Pcdh $\gamma$ B3 dimer, these covarying pairs are somewhat further apart than true interface contacts (**Figure 4B**), which could be due to differences in dimerization interfaces, as we observe between the clustered Pcdh families, or in the  $\delta$ -1 or  $\delta$ -2 Pcdhs secondary structure, for which there are no available structures. This analysis thus predicts an antiparallel EC1-4 interaction in members of the non-clustered Pcdhs. Notably, we cannot determine whether all members or only a subset – and if

so, which – likely use this architecture. However maximum parsimony suggests that the ancestral Pcdh used the antiparallel EC1-4 dimer interaction, and Pcdh members which do not show this interaction mechanism either diverged before it evolved or lost it subsequently.

Finally, we looked at the composition of a predicted non-clustered Pcdh interface, by selecting residues homologous to those found at clustered Pcdh interfaces. The predicted EC1/EC4 interface residues are predominantly hydrophobic, while EC2/EC3 residues have more polar and ionic character (**Figure 4C**). Notably, positions 41 and 77 in EC1 and 320, 321, 371 and 373 in EC4 are more hydrophobic in non-clustered than clustered Pcdhs, indicating that these may form contacts in some non-clustered Pcdhs. Thus, like in the clustered Pcdhs, the EC1/EC4 interaction may promote dimer affinity while the EC2/EC3 interaction provides specificity.

## Conclusions

Recently, we and others predicted that clustered Pcdhs form homophilic antiparallel EC1-EC4 complexes based on crystal structures, mutagenesis and bioinformatics (Nicoludis et al., 2015; Rubinstein et al., 2015). Our structure of Pcdh $\gamma$ B3 EC1-4 confirms our sequence coevolution analysis, demonstrating the robustness of the analysis and revealing the molecular details of this interaction. Here we extended this prediction to other non-clustered Pcdhs using sequence coevolution analysis.

Analysis of the Pcdh $\gamma$ B3 EC1-4 structure in comparison to  $\alpha$  or  $\beta$  subfamily dimers revealed structural differences that correlated with differences in isoform-specific conservation, indicating distinct specificity mechanisms. Unlike the Dscams, where isoforms vary at specific alternatively-spliced regions (Li et al., 2016; Meijers et al., 2007; Sawaya et al., 2008; Wojtowicz et al., 2007), the clustered Pcdh subfamilies are structurally diverse, and thus can encode specificity in different ways.

We identified a hydrophobic interaction between EC1 and EC4 that contributes to dimerization affinity, whereas its conservation among clustered Pcdh isoforms suggests that this interaction is not a driver of specificity. Overall, our data support a general role for conserved hydrophobic EC1/EC4 interactions in affinity, and for highly diversified polar EC2/EC3 contacts in specificity, and sequence analyses suggest that this is conserved in at least some non-clustered Pcdhs.

## Materials and Methods

### *Expression, purification and crystallization of PcdhyB3 EC1-4*

Human PcdhyB3 EC1-4 (residues 1-414, not counting the signal peptide) was cloned into pET21 with a C-terminal hexahistidine tag, expressed in BL21 Gold (DE3) *Escherichia coli* cells in terrific broth. Cells were induced at OD<sub>600</sub> = 0.8 with 0.5 mM isopropyl β-D-1-thiogalactopyranoside (IPTG) at 37°C for 4 hr, harvested and lysed by sonication in 8 M guanadinium hydrochloride (GuHCl), 50 mM HEPES pH 7.5, 2 mM CaCl<sub>2</sub>, and 20 mM imidazole. Cell lysates were diluted to 5 M GuHCl and loaded onto Ni-Sepharose, washed with 50 mM HEPES pH 7.5, 250 mM NaCl, 10 mM CaCl<sub>2</sub>, and 25 mM imidazole and eluted with 250 mM imidazole. Eluted protein was refolded at 1 mg/mL in 12-hr dialysis steps reducing the GuHCl concentration from 2.5 M to 1.25 M and finally 0 M in refolding buffer (100 mM Tris pH 8.5, 10 mM CaCl<sub>2</sub>, 1 mM EDTA, 5 mM dithiothreitol (DTT), and 0.75 M L-arginine). Concentrated refolded protein was purified by size-exclusion chromatography (SEC) on a Superdex 200 16/60 column (GE Healthcare, Pittsburg, PA) in 20 mM Tris pH 8.5, 200 mM NaCl, and 2 mM CaCl<sub>2</sub> (SEC buffer). Two peaks were isolated and each peak was run again separately by SEC before being concentrated for crystallization.

### *Multi-angle light scattering (MALS)*

Approximate molecular mass of Pcdh $\gamma$ B3 EC1-4 protein (WT or F86A mutant) was determined using a Superdex S200 10/300 column (GE Healthcare, Pittsburgh, PA) with in-line Wyatt Dawn Heleos II and Optilab T-rex refractive index detectors. Protein (100  $\mu$ L at 4 mg/mL) was injected and run at 0.4 mL/min in SEC buffer. Signals were aligned, normalized and band-broadened using bovine serum albumin as a standard.

### *Crystallization, data collection, and structure determination and analysis*

Crystals were obtained by vapor diffusion at room temperature in 0.1 M HEPES pH 7, 4% ethylene glycol, and 5% polyethylene glycol monomethyl ether 500 in a 0.3  $\mu$ L protein (12 mg/mL) to 0.3  $\mu$ L reservoir drop, then cryoprotected with reservoir with 20% glycerol before flash cooling in liquid N<sub>2</sub>. Diffraction data (**Table S1**) processed in HKL2000 (Otwinowski and Minor, 1997). The Pcdh $\gamma$ B3 EC1-4 structure was determined by an iterative molecular replacement search with single domains of the Pcdh $\gamma$ A1 EC1-3 structure (PDBID 4zi9) in PHENIX (Adams et al., 2010). Model building was done in Coot (Emsley and Cowtan, 2004) and refinement in PHENIX (Adams et al., 2010). We analyzed the physicochemical properties of the dimer interface using PISA (Krissinel and Henrick, 2007). In the structure, we found a HEPES molecule near the EC2/EC3 interface that forms a salt bridge with N253 and N155 (**Figure S6**). MALS data were collected with Tris as the buffer (**Figure S1**), indicating that HEPES is not required for dimerization.

### *ICR value calculations*

Overall percent identity of the most common residue at each position was used to calculate ICR values, dividing the percent identity across subfamily orthologs by the percent identity across subfamily paralogs. ICR values were then normalized by dividing by the whole



sequence ICR average within each subfamily. The alignment and identity data are provided here (Nicoludis et al., 2015).

### *Computational Interface Alanine Scanning Server*

Pcdh $\alpha$ 4 EC1-4 (5dzw) Pcdh $\alpha$ 7 EC1-5 (5dzv) Pcdh $\beta$ 6 EC1-4 (5dzy) Pcdh $\beta$ 8 EC1-4 (5dzy) Pcdh $\gamma$ B3 EC1-4 (5k8r) dimer structures were submitted to the Computational Interface Alanine Scanning Server using default settings (Kortemme and Baker, 2002; Kortemme et al., 2004).

### *Covariation analyses*

Previously, we generated an alignment of clustered Pcdhs using mouse Pcdh $\gamma$ C3 and manually filtered by phylogeny, using FastTree 2.1 (Price et al., 2010), to eliminate non-clustered Pcdhs (**Figure S7**) (Nicoludis et al., 2015). Both this clustered Pcdh and the now separated non-clustered Pcdh alignment were filtered to remove sequences with more than 50% gaps and columns with more than 30% gaps, and trimmed to contain only EC1-EC4. The clustered and non-clustered Pcdh alignments 2660 and 405.5 non-redundant sequences, respectively, where sequences with more than 90% identity over their full length are considered redundant. Evolutionary couplings (Hopf et al., 2014; Marks et al., 2011) were computed using the updated ‘PLMC’ algorithm ((Weinreb et al., 2015) available on <https://github.com/debbiemarkslab/plmc>, which uses a pseudo maximum likelihood approximation (Balakrishnan et al., 2011; Ekeberg et al., 2013; Kamisetty et al., 2013).

We used the precision of the intra-domain evolutionary couplings to determine whether the inter-domain evolutionary couplings are likely to be true. For the clustered Pcdh alignment, 96 non-local (more than five residues apart) contacts fall above a threshold of 85% precision of the intra-domain evolutionary couplings. Intra-domain evolutionary couplings are considered

true if they correspond to structural contact (minimum atom distance < 8 Å) in any structure (**Figure S5**). Based on the same 85% precision threshold, the top 45 non-local ECs are significant in the non-clustered Pcdh alignment. We exclude couplings between residues greater than 400 in this analysis due to the false signal from gaps in this region.

## Acknowledgements

We thank Kelly Arnett, director of the Center for Macromolecular Interactions, Harvard Medical School) for help in collecting SEC-MALS data. We thank the beamline staff of NE-CAT at the Advanced Photon Source (Argonne, IL, USA) for help with data collection. NE-CAT is funded by NIH (P41 GM103403 and S10 RR029205) and the Advances Photon Source by the US Department of Energy (DE-AC02-06CH11357). Evolutionary couplings analysis was conducted on the Orchestra High Performance Compute Cluster at Harvard Medical School, which is funded by the NIH (NCRR 1S10RR028832-01). Financial support (to JMN) was provided by the National Defense Science and Engineering Graduate Fellowship. AGG was supported by the National Science Foundation Graduate Research Fellowship (DGE1144152). DSM was supported by National Institutes of Health (GM106303).

## Competing Interests

The authors declare that no competing interests exist.

## References

Adams, P.D., Afonine, P. V, Bunkóczi, G., Chen, V.B., Davis, I.W., Echols, N., Headd, J.J., Hung, L.-W., Kapral, G.J., Grosse-Kunstleve, R.W., McCoy, A.J., Moriarty, N.W., Oeffner, R., Read, R.J., Richardson, D.C., Richardson, J.S., Terwilliger, T.C., Zwart, P.H., 2010. PHENIX: a comprehensive Python-based system for macromolecular structure solution.

- Acta Crystallogr. D. Biol. Crystallogr. 66, 213–21. doi:10.1107/S0907444909052925
- Balakrishnan, S., Kamisetty, H., Carbonell, J.G., Lee, S.-I., Langmead, C.J., 2011. Learning generative models for protein fold families. *Proteins* 79, 1061–1078. doi:10.1002/prot.22934
- Biswas, S., Emond, M.R., Jontes, J.D., 2012. The clustered protocadherins Pcdha and Pcdhy form a heteromeric complex in zebrafish. *Neuroscience* 219, 280–289. doi:10.1016/j.neuroscience.2012.05.058
- Boggon, T.J., Murray, J., Chappuis-Flament, S., Wong, E., Gumbiner, B.M., Shapiro, L., 2002. C-cadherin ectodomain structure and implications for cell adhesion mechanisms. *Science* 296, 1308–1313. doi:10.1126/science.1071559
- Chen, W. V, Alvarez, F.J., Lefebvre, J.L., Friedman, B., Nwakeze, C., Geiman, E., Smith, C., Thu, C.A., Tapia, J.C., Tasic, B., Sanes, J.R., Maniatis, T., 2012. Functional Significance of Isoform Diversification in the Protocadherin Gamma Gene Cluster. *Neuron* 75, 402–409.
- Ekeberg, M., Lövkvist, C., Lan, Y., Weigt, M., Aurell, E., 2013. Improved contact prediction in proteins: Using pseudolikelihoods to infer Potts models. *Phys. Rev. E - Stat. Nonlinear, Soft Matter Phys.* 87, 1–16. doi:10.1103/PhysRevE.87.012707
- Emond, M.R., Jontes, J.D., 2008. Inhibition of protocadherin- $\alpha$  function results in neuronal death in the developing zebrafish. *Dev. Biol.* 321, 175–187. doi:10.1016/j.ydbio.2008.06.011
- Emsley, P., Cowtan, K., 2004. Coot: model-building tools for molecular graphics. *Acta Crystallogr. D. Biol. Crystallogr.* 60, 2126–32. doi:10.1107/S0907444904019158
- Frank, M., Ebert, M., Shan, W., Phillips, G.R., Arndt, K., Colman, D.R., Kemler, R., 2005. Differential expression of individual gamma-protocadherins during mouse brain development. *Mol. Cell. Neurosci.* 29, 603–616. doi:10.1016/j.mcn.2005.05.001

- Garrett, A.M., Schreiner, D., Lobas, M. a., Weiner, J. a., 2012.  $\gamma$ -Protocadherins Control Cortical Dendrite Arborization by Regulating the Activity of a FAK/PKC/MARCKS Signaling Pathway. *Neuron* 74, 269–276. doi:10.1016/j.neuron.2012.01.028
- Goodman, K.M., Rubinstein, R., Thu, C.A., Bahna, F., Mannepalli, S., Ahlsén, G., Rittenhouse, C., Maniatis, T., Honig, B., Shapiro, L., 2016. Structural Basis of Diverse Homophilic Recognition by Clustered  $\alpha$ - and  $\beta$ -Protocadherins. *Neuron* 90, 709–23. doi:10.1016/j.neuron.2016.04.004
- Hasegawa, S., Hamada, S., Kumode, Y., Esumi, S., Katori, S., Fukuda, E., Uchiyama, Y., Hirabayashi, T., Mombaerts, P., Yagi, T., 2008. The protocadherin- $\alpha$  family is involved in axonal coalescence of olfactory sensory neurons into glomeruli of the olfactory bulb in mouse. *Mol. Cell. Neurosci.* 38, 66–79. doi:10.1016/j.mcn.2008.01.016
- Hasegawa, S., Hirabayashi, T., Kondo, T., Inoue, K., Esumi, S., Okayama, A., Hamada, S., Yagi, T., 2012. Constitutively expressed Protocadherin- $\alpha$  regulates the coalescence and elimination of homotypic olfactory axons through its cytoplasmic region. *Front. Mol. Neurosci.* 5, 97. doi:10.3389/fnmol.2012.00097
- Hayashi, S., Takeichi, M., 2015. Emerging roles of protocadherins: from self-avoidance to enhancement of motility. *J. Cell Sci.* 128, 1–10. doi:10.1242/jcs.166306
- Hirano, S., Yan, Q., Suzuki, S.T., 1999. Expression of a novel protocadherin, OL-protocadherin, in a subset of functional systems of the developing mouse brain. *J. Neurosci.* 19, 995–1005.
- Hopf, T.A., Schärfe, C.P.I., Rodrigues, J.P.G.L.M., Green, A.G., Sander, C., Bonvin, A.M.J.J., Marks, D.S., 2014. Sequence co-evolution gives 3D contacts and structures of protein complexes. *Elife* 3, e03430. doi:10.7554/eLife.03430
- Hoshina, N., Tanimura, A., Yamasaki, M., Inoue, T., Fukabori, R., Kuroda, T., Yokoyama, K.,

- Tezuka, T., Sagara, H., Hirano, S., Kiyonari, H., Takada, M., Kobayashi, K., Watanabe, M., Kano, M., Nakazawa, T., Yamamoto, T., 2013. Protocadherin 17 regulates presynaptic assembly in topographic corticobasal ganglia circuits. *Neuron* 78, 839–854.  
doi:10.1016/j.neuron.2013.03.031
- Hulpiau, P., Sahin Gul, I., van Roy, F., 2013. New Insights into the Evolution of Metazoan Cadherins and Catenins, in: Roy, Van, F. (Ed.), *The Molecular Biology of Cadherins*. Elsevier, San Diego, CA, pp. 71–94.
- Hulpiau, P., Van Roy, F., 2011. New insights into the evolution of metazoan cadherins. *Mol. Biol. Evol.* 28, 647–657. doi:10.1093/molbev/msq233
- Kamisetty, H., Ovchinnikov, S., Baker, D., 2013. Assessing the utility of coevolution-based residue-residue contact predictions in a sequence- and structure-rich era. *Proc. Natl. Acad. Sci. U. S. A.* 110, 1–6. doi:10.1073/pnas.1314045110
- Kaneko, R., Kato, H., Kawamura, Y., Esumi, S., Hirayama, T., Hirabayashi, T., Yagi, T., 2006. Allelic gene regulation of Pcdh- $\alpha$  and Pcdh- $\gamma$  clusters involving both monoallelic and biallelic expression in single Purkinje cells. *J. Biol. Chem.* 281, 30551–30560.  
doi:10.1074/jbc.M605677200
- Katori, S., Hamada, S., Noguchi, Y., Fukuda, E., Yamamoto, T., Yamamoto, H., Hasegawa, S., Yagi, T., 2009. Protocadherin- $\alpha$  Family Is Required for Serotonergic Projections to Appropriately Innervate Target Brain Areas. *J. Neurosci.* 29, 9137–9147.  
doi:10.1523/JNEUROSCI.5478-08.2009
- Keeler, A.B., Molumby, M.J., Weiner, J.A., 2015. Protocadherins branch out: Multiple roles in dendrite development. *Cell Adh. Migr.* 9, 214–226. doi:10.1080/19336918.2014.1000069
- Kim, S.H., Yamamoto, a, Bouwmeester, T., Agius, E., Robertis, E.M., 1998. The role of paraxial protocadherin in selective adhesion and cell movements of the mesoderm during *Xenopus*

- gastrulation. *Development* 125, 4681–4690.
- Kim, S.Y., Yasuda, S., Tanaka, H., Yamagata, K., Kim, H., 2011. Non-clustered protocadherin. *Cell Adhes. Migr.* 5, 97–105. doi:10.4161/cam.5.2.14374
- Kortemme, T., Baker, D., 2002. A simple physical model for binding energy hot spots in protein-protein complexes. *Proc. Natl. Acad. Sci. U. S. A.* 99, 14116–14121. doi:10.1073/pnas.202485799
- Kortemme, T., Kim, D.E., Baker, D., 2004. Computational Alanine Scanning of Protein-Protein Interfaces. *Sci. Signal.* 219, 1–9. doi:10.1126/stke.2192004pl2
- Kostadinov, D., Sanes, J.R., 2015. Protocadherin-dependent dendritic self-avoidance regulates neural connectivity and circuit formation. *Elife* 4, e08964. doi:10.7554/eLife.0864
- Krissinel, E., Henrick, K., 2007. Inference of Macromolecular Assemblies from Crystalline State. *J. Mol. Biol.* 372, 774–797. doi:10.1016/j.jmb.2007.05.022
- Kuroda, H., Inui, M., Sugimoto, K., Hayata, T., Asashima, M., 2002. Axial protocadherin is a mediator of prenotochord cell sorting in *Xenopus*. *Dev. Biol.* 244, 267–277. doi:10.1006/dbio.2002.0589
- Ledderose, J., Dieter, S., Schwarz, M.K., 2013. Maturation of postnatally generated olfactory bulb granule cells depends on functional  $\gamma$ -protocadherin expression. *Sci. Rep.* 3, 1514. doi:10.1038/srep01514
- Lefebvre, J.L., Kostadinov, D., Chen, W. V, Maniatis, T., Sanes, J.R., 2012. Protocadherins mediate dendritic self-avoidance in the mammalian nervous system. *Nature* 488, 517–21. doi:10.1038/nature11305
- Li, S., Cheng, L., Yu, Y., Chen, Q., 2016. Structural basis of Dscam1 homodimerization: Insights into context constraint for protein recognition. *Sci. Adv.* 2, 1–9.

- Marks, D.S., Colwell, L.J., Sheridan, R., Hopf, T.A., Pagnani, A., Zecchina, R., Sander, C.,  
2011. Protein 3D structure computed from evolutionary sequence variation. PLoS One 6,  
e28766. doi:10.1371/journal.pone.0028766
- Meijers, R., Puettmann-Holgado, R., Skiniotis, G., Liu, J., Walz, T., Wang, J., Schmucker, D.,  
2007. Structural basis of Dscam isoform specificity. Nature 449, 487–91.  
doi:10.1038/nature06147
- Molumby, M.J., Keeler, A.B., Weiner, J.A., 2016. Homophilic Protocadherin Cell-Cell  
Interactions Article Homophilic Protocadherin Cell-Cell Interactions Promote Dendrite  
Complexity. Cell Rep. 15, 1037–1050. doi:10.1016/j.celrep.2016.03.093
- Nicoludis, J.M., Lau, S., Scharfe, C., Marks, D.S., Weihofen, W.A., Gaudet, R., 2015. Structure  
and Sequence Analyses of Clustered Protocadherins Reveal Antiparallel Interactions that  
Mediate Homophilic Specificity. Structure 23, 2087–2098. doi:10.1016/j.str.2015.09.005
- Otwinowski, Z., Minor, W., 1997. Processing of X-ray Diffraction Data Collected in Oscillation  
Mode, in: Carter Jr., C.W., Sweet, R.M. (Eds.), Methods in Enzymology, Volume 276:  
Macromolecular Crystallography, Part A. Academic Press, New York, pp. 307–326.
- Price, M.N., Dehal, P.S., Arkin, A.P., 2010. FastTree 2 - Approximately maximum-likelihood  
trees for large alignments. PLoS One 5, e9490. doi:10.1371/journal.pone.0009490
- Rashid, D., Newell, K., Shama, L., Bradley, R., 2006. A requirement for NF-protocadherin and  
TAF1/Set in cell adhesion and neural tube formation. Dev. Biol. 291, 170–181.  
doi:10.1016/j.ydbio.2005.12.027
- Rubinstein, R., Thu, C.A., Goodman, M., Maniatis, T., Shapiro, L., Honig, B., Rubinstein, R.,  
Thu, C.A., Goodman, K.M., Wolcott, H.N., Bahna, F., 2015. Molecular Logic of Neuronal  
Self-Recognition through Protocadherin Domain Interactions Article Molecular Logic of  
Neuronal Self-Recognition through Protocadherin Domain Interactions. Cell 163, 1–14.

doi:10.1016/j.cell.2015.09.026

Sawaya, M.R., Wojtowicz, W.M., Andre, I., Qian, B., Wu, W., Baker, D., Eisenberg, D., Zipursky, S.L., 2008. A double S shape provides the structural basis for the extraordinary binding specificity of Dscam isoforms. *Cell* 134, 1007–18. doi:10.1016/j.cell.2008.07.042

Schreiner, D., Weiner, J.A., 2010. Combinatorial homophilic interaction between  $\gamma$ -protocadherin multimers greatly expands the molecular diversity of cell adhesion. *Proc. Natl. Acad. Sci. U. S. A.* 107, 14893–8. doi:10.1073/pnas.1004526107

Sotomayor, M., Gaudet, R., Corey, D.P., 2014. Sorting out a promiscuous superfamily: towards cadherin connectomics. *Trends Cell Biol.* 24, 524–36. doi:10.1016/j.tcb.2014.03.007

Suo, L., Lu, H., Ying, G., Capecchi, M.R., Wu, Q., 2012. Protocadherin clusters and cell adhesion kinase regulate dendrite complexity through Rho GTPase. *J. Mol. Cell Biol.* 4, 362–376. doi:10.1093/jmcb/mjs034

Thu, C.A., Chen, W. V., Rubinstein, R., Chevee, M., Wolcott, H.N., Falsovalyi, K.O., Tapia, J.C., Shapiro, L., Honig, B., Maniatis, T., 2014. Single-Cell Identity Generated by Combinatorial Homophilic Interactions between  $\alpha$ ,  $\beta$ , and  $\gamma$  Protocadherins. *Cell* 158, 1045–1059. doi:10.1016/j.cell.2014.07.012

Wang, X., Weiner, J. a., Levi, S., Craig, A.M., Bradley, A., Sanes, J.R., 2002. Gamma protocadherins are required for survival of spinal interneurons. *Neuron* 36, 843–854. doi:10.1016/S0896-6273(02)01090-5

Weiner, J. a, Wang, X., Tapia, J.C., Sanes, J.R., 2005. Gamma protocadherins are required for synaptic development in the spinal cord. *Proc. Natl. Acad. Sci. U. S. A.* 102, 8–14. doi:10.1073/pnas.0407931101

Weinreb, C., Riesselman, A.J., Ingraham, J.B., Gross, T., Sander, C., Marks, D.S., 2015. 3D



RNA and Functional Interactions from Evolutionary Couplings. *Cell* 165, 963–975.

doi:10.1016/j.cell.2016.03.030

Wojtowicz, W.M., Wu, W., Andre, I., Qian, B., Baker, D., Zipursky, S.L., 2007. A vast repertoire of Dscam binding specificities arises from modular interactions of variable Ig domains. *Cell* 130, 1134–45. doi:10.1016/j.cell.2007.08.026

Wu, Q., 2005. Comparative genomics and diversifying selection of the clustered vertebrate protocadherin genes. *Genetics* 169, 2179–88. doi:10.1534/genetics.104.037606

Yamagata, K., Andreasson, K.I., Sugiura, H., Maru, E., Dominique, M., Irie, Y., Miki, N., Hayashi, Y., Yoshioka, M., Kaneko, K., Kato, H., Worley, P.F., 1999. Arcadlin is a neural activity-regulated cadherin involved in long term potentiation. *J. Biol. Chem.* 274, 19473–19479. doi:10.1074/jbc.274.27.19473

Yoshida, K., 2003. Fibroblast cell shape and adhesion in vitro is altered by overexpression of the 7A and 7B isoforms of protocadherin 7, but not the 7C isoform. *Cell. Mol. Biol. Lett.* 8, 735–741.

Zipursky, S.L., Sanes, J.R., 2010. Chemoaffinity revisited: dscams, protocadherins, and neural circuit assembly. *Cell* 143, 343–53. doi:10.1016/j.cell.2010.10.009

## Figures and legends

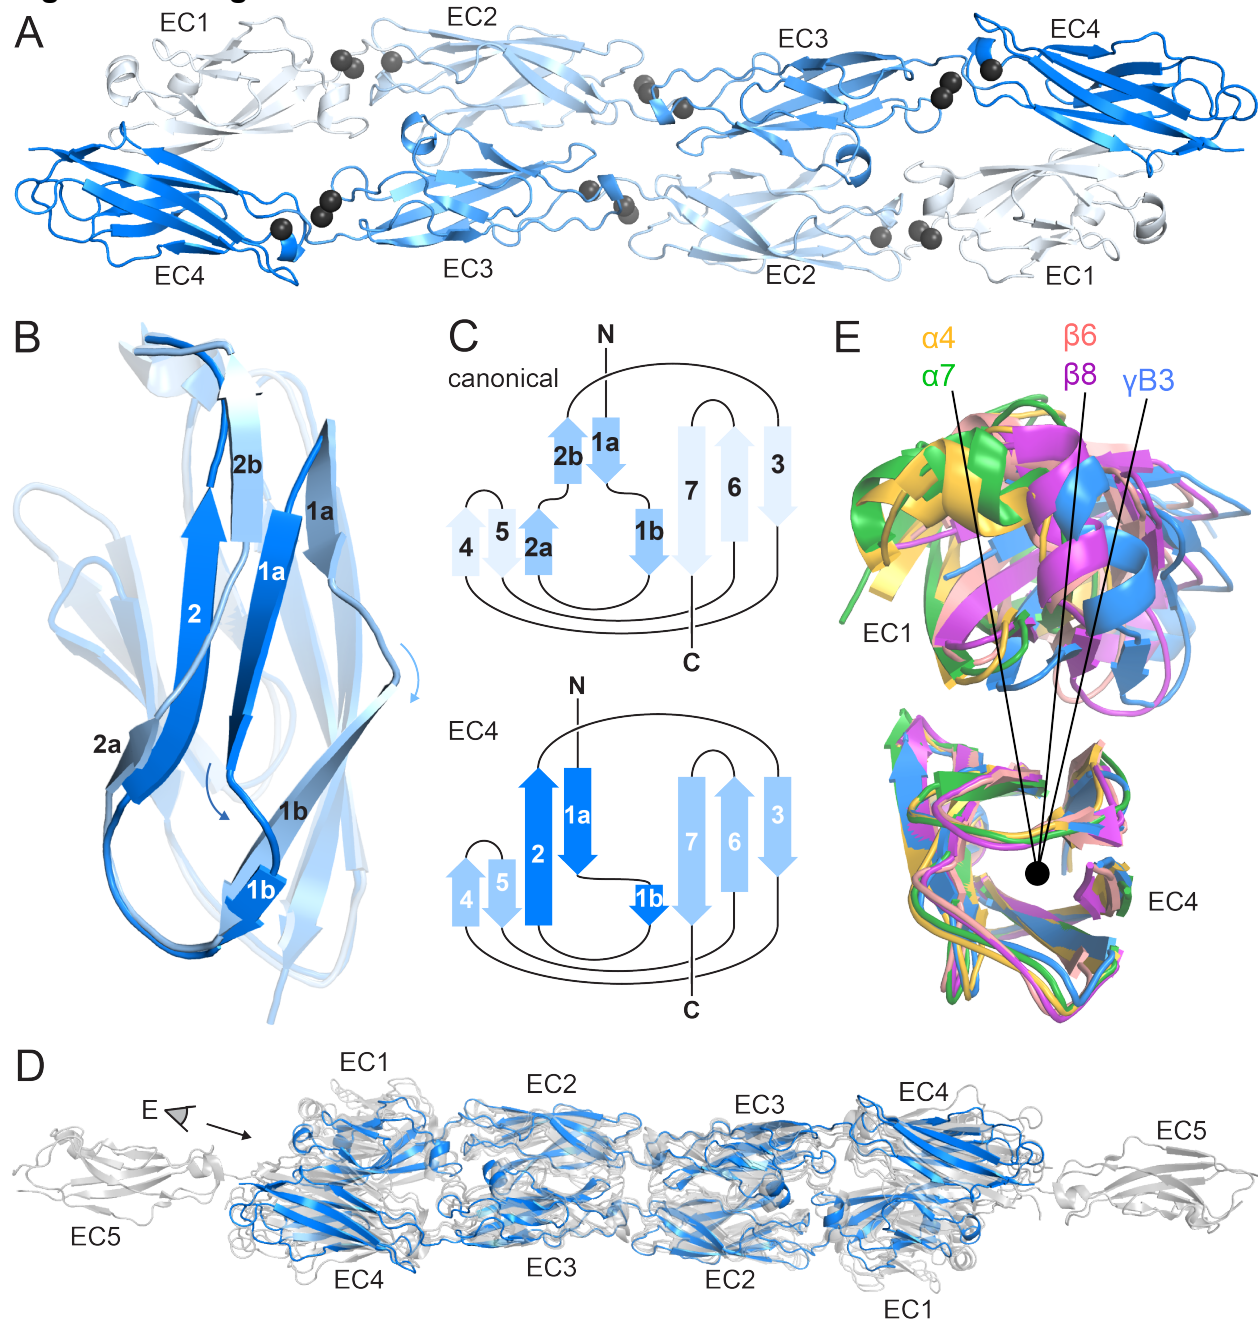

**Figure 1.** PcdhyB3 EC1-4 extended antiparallel dimer relies on unusual EC4 topology and is similar to other clustered Pcdh dimers. (A) Structure of the PcdhyB3 EC1-4 antiparallel dimer, with each EC a different shade of blue and the  $\text{Ca}^{2+}$  ions in grey. (B) Superposition of PcdhyB3 EC2 and EC4 highlighting the differences in  $\beta$ -strands 1 and 2. (C) Comparison of the canonical cadherin (top) and EC4 (bottom) topology. (D) The structures of Pcdh dimers  $\alpha 4$  EC1-4,  $\alpha 7$  EC1-5,  $\beta 6$  EC1-4, and  $\beta 8$  EC1-4 (grey) were superimposed using the dimeric EC2-3 region onto  $\gamma B3$  EC1-4 (blue), illustrating variations in twist/corkscrew. (E) The EC4 domains of clustered Pcdh structures (colored as labeled) were superimposed, highlighting EC1 position differences that correlate with subfamily. Point of view (eye symbol) shown in (D).

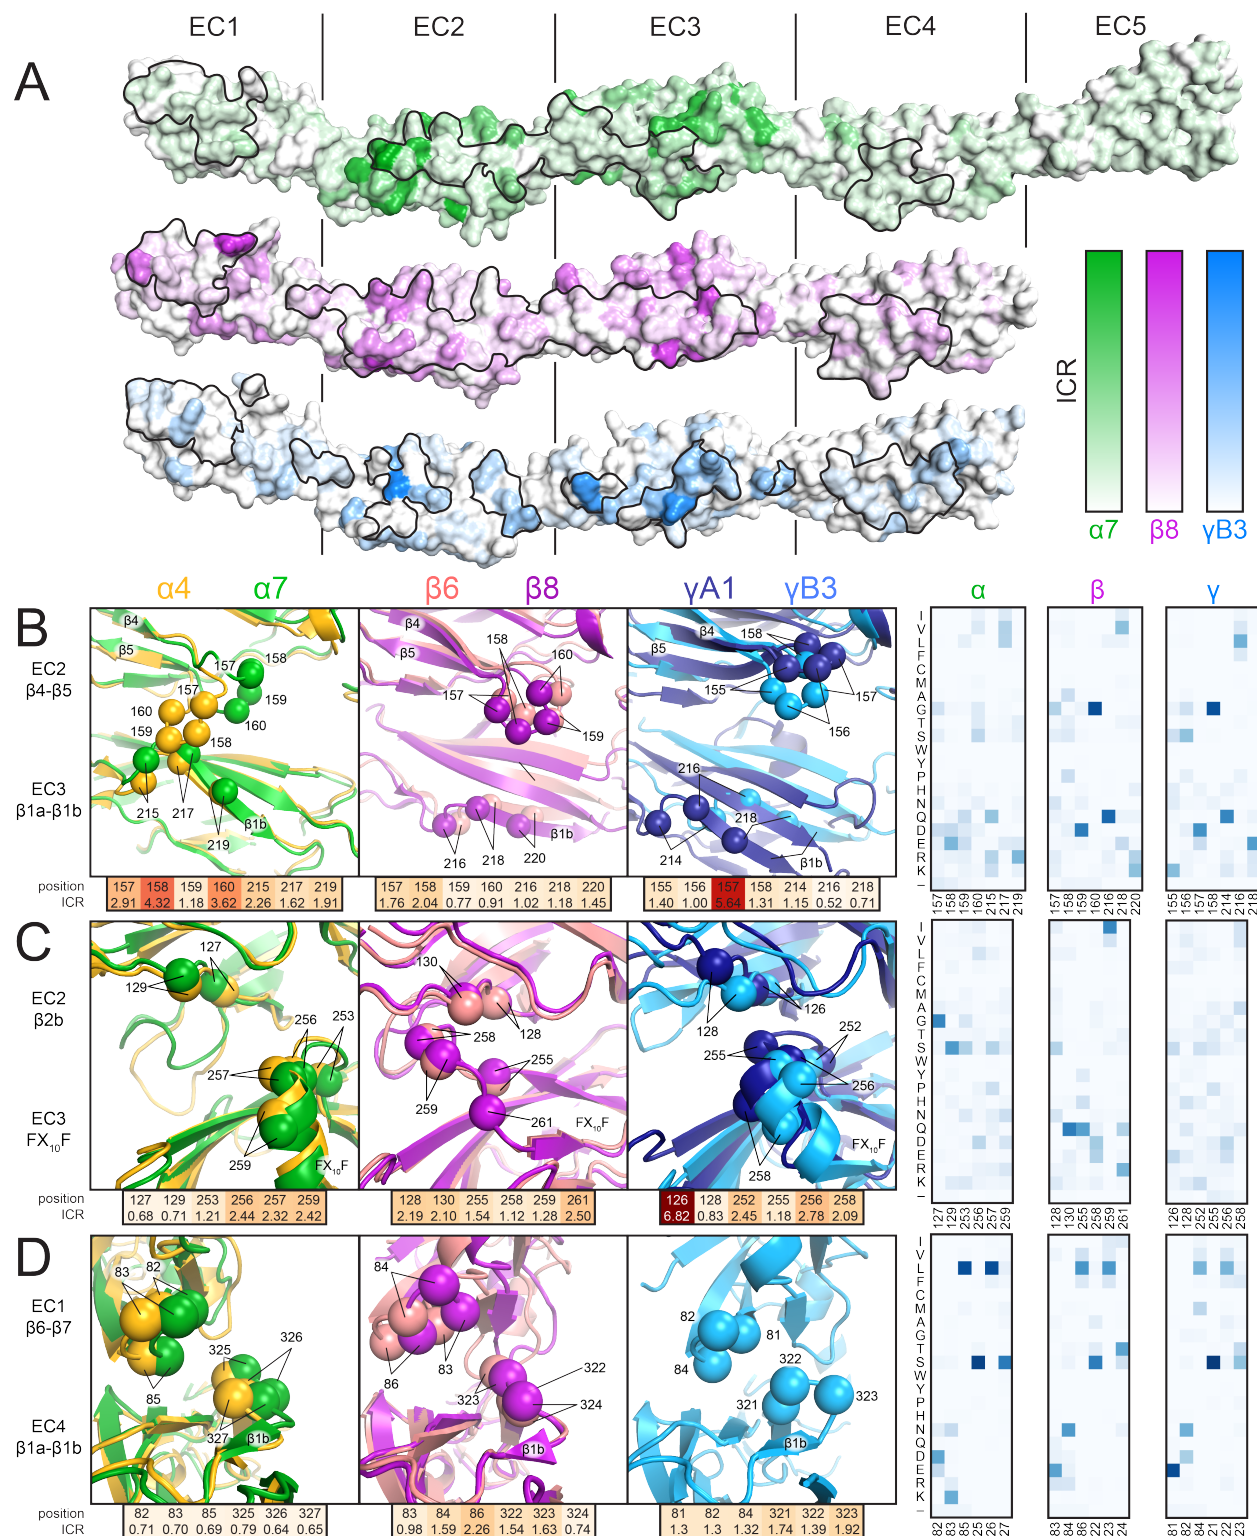

**Figure 2.** Isoform-specific conservation and structural differences reveal subfamily differences in diversity generation. (A) Subfamily-specific ICR values mapped onto the surfaces of Pcdha7 (top, green), Pcdhb8 (middle, magenta) and PcdhyB3 (bottom, blue). The black outline marks the dimer interface footprint. (B, C, D) Unique structural

features of the  $\alpha$  (left),  $\beta$  (center), and  $\gamma$  (right) structures (colored according to Figure 1). ICR values for highlighted residues shown below and normalized amino acid frequencies for these positions shown on the right

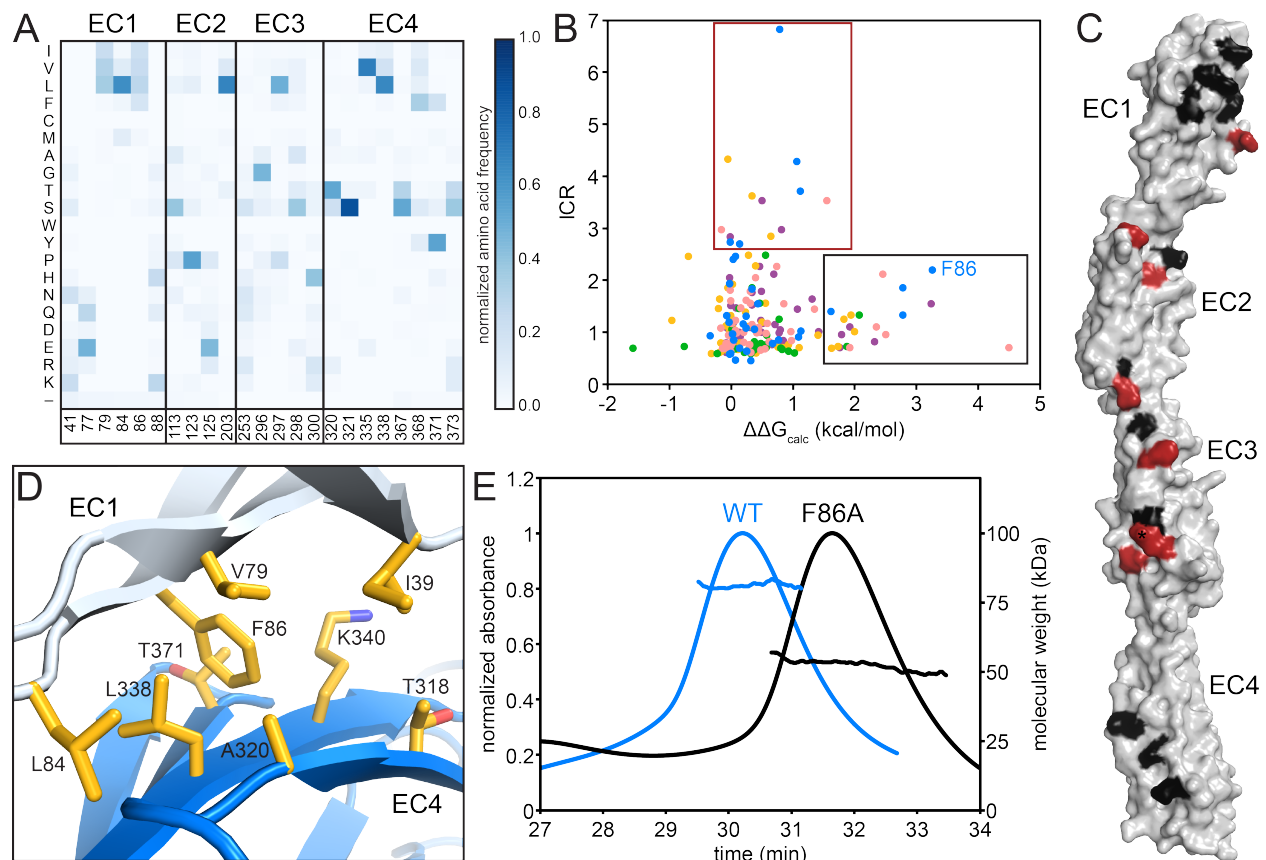

**Figure 3.** The EC1/EC4 interface is enriched in affinity-driving hydrophobic residues, while the EC2/EC3 interface contains high-ICR residues driving specificity. (A) Amino acid frequencies in clustered Pcdhs of conserved interface residues (see Figure S3). (B) Plot of ICR value and  $\Delta\Delta G_{\text{calc}}$  of interface residues of Pcdh  $\alpha 4$  EC1-4 (yellow)  $\alpha 7$  EC1-5 (green),  $\beta 6$  EC1-4 (salmon),  $\beta 8$  EC1-4 (magenta),  $\gamma B3$  EC1-4 (blue). Two subsets of interface residues segregate from the main cluster: high- $\Delta\Delta G_{\text{calc}}$  and low-ICR residues ('affinity'; black box) and low- $\Delta\Delta G_{\text{calc}}$  and high-ICR residues ('specificity'; crimson box). Residue F86 from PcdhYB3 EC1-4 is labeled. (C) High- $\Delta\Delta G_{\text{calc}}$  and low-ICR residues (black) map primarily to EC1 and EC4, while low- $\Delta\Delta G_{\text{calc}}$  and high-ICR residues (crimson) primarily map to EC2 and EC3. N253 (\*) is found in the 'specificity' region for  $\gamma B3$  and in the 'affinity' region for  $\beta 6$  and  $\beta 8$ . (D) The EC1/EC4 interface features a hydrophobic cluster, with EC1 F86 near its center. (E) SEC-MALS profiles of WT PcdhYB3 EC1-4 (blue; molecular weight 82 kDa) and F86A (black; molecular weight 52 kDa) run on a Superdex S200 10/300 column, are consistent with dimeric and monomeric proteins, respectively.



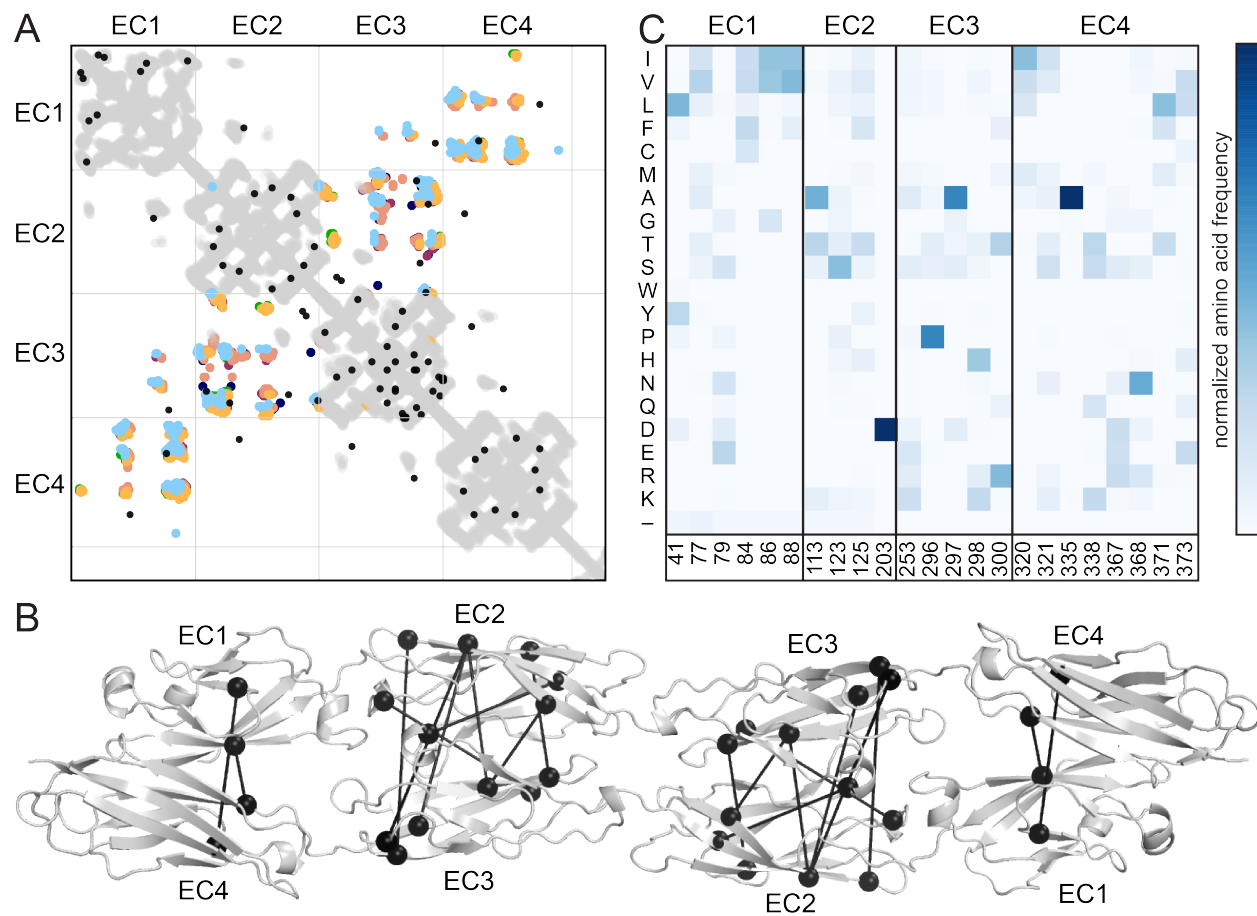

**Figure 4.** Evolutionary couplings in non-clustered Pcdhs predict an antiparallel interface engaging EC1-EC4. (A) The top 45 covarying pairs are shown in black, and include a number of EC1-EC4 and EC2-EC3 covarying residue pairs. The intramolecular contact maps of PcdhyB3 EC1-4, Pcdh $\alpha$ 4 EC1-4, Pcdh $\alpha$ 7 EC1-4, Pcdh $\beta$ 6 EC1-4, Pcdh $\beta$ 8 EC1-4 and PcdhyA1 EC1-3 are in gray for reference. The observed interface contact residues are also mapped ( $\alpha$ 4, yellow;  $\alpha$ 7, green;  $\beta$ 6, salmon;  $\beta$ 8, magenta;  $\gamma$ B3, blue;  $\gamma$ A1, dark blue). (B) Covarying residue pairs across EC1-EC4 or EC2-EC3 are mapped onto the PcdhyB3 EC1-4 structure with a line between coupled residues. (C) Amino acid frequencies at non-clustered Pcdh alignment positions corresponding to the conserved interface residue positions identified in clustered Pcdhs (Figure S3).
